# Supplementary material for: Effect of fluoro and hydroxy analogies of diglyme on sodium-ion storage in graphite: a computational study
Source: Royal Society of Chemistry journal article supplement (doi:10.1039/d3cp00903c), 2023-01-01
Supplement: d3cp00903c1.pdf [file d3cp00903c1.pdf]

## Supporting Information

### Effect of Fluoro and Hydroxy Analogies of Diglyme on Sodium-Ion Storage in Graphite: A Computational Study

R. M. N. M. Rathnayake <sup>a</sup>, Debra J. Searles <sup>b,c</sup>, Timothy T. Duignan <sup>a</sup>, X. S. Zhao <sup>a,d,\*</sup>

\* Corresponding author E-mail: [chezxs@qdu.edu.cn](mailto:chezxs@qdu.edu.cn)

<sup>a</sup> School of Chemical Engineering, The University of Queensland, St Lucia, Brisbane 4072, Australia

<sup>b</sup> Centre for Theoretical and Computational Molecular Science, Australian Institute for Bioengineering and Nanotechnology, The University of Queensland, Brisbane, QLD, 4072, Australia

<sup>c</sup> School of Chemistry and Molecular Biosciences, The University of Queensland, Brisbane, QLD, 4072, Australia

<sup>d</sup> Institute of Materials for Energy and Environment, Qingdao University, 308 Ningxia Road, Qingdao 266071, China.

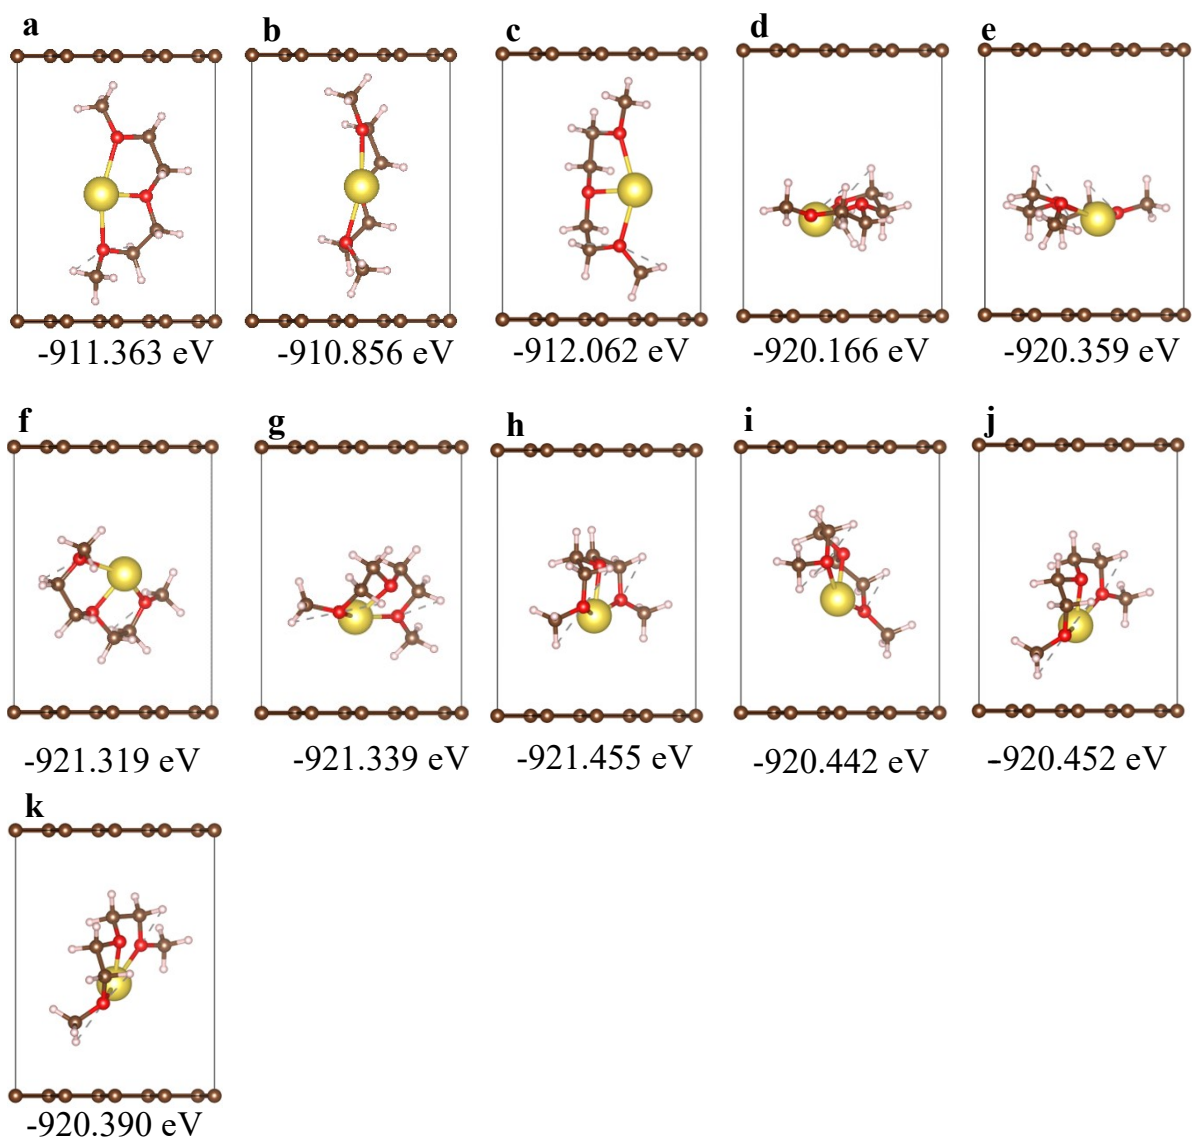

**Fig. S1** Initial configurations used to identify the most stable structure for  $D_2$ -G system.

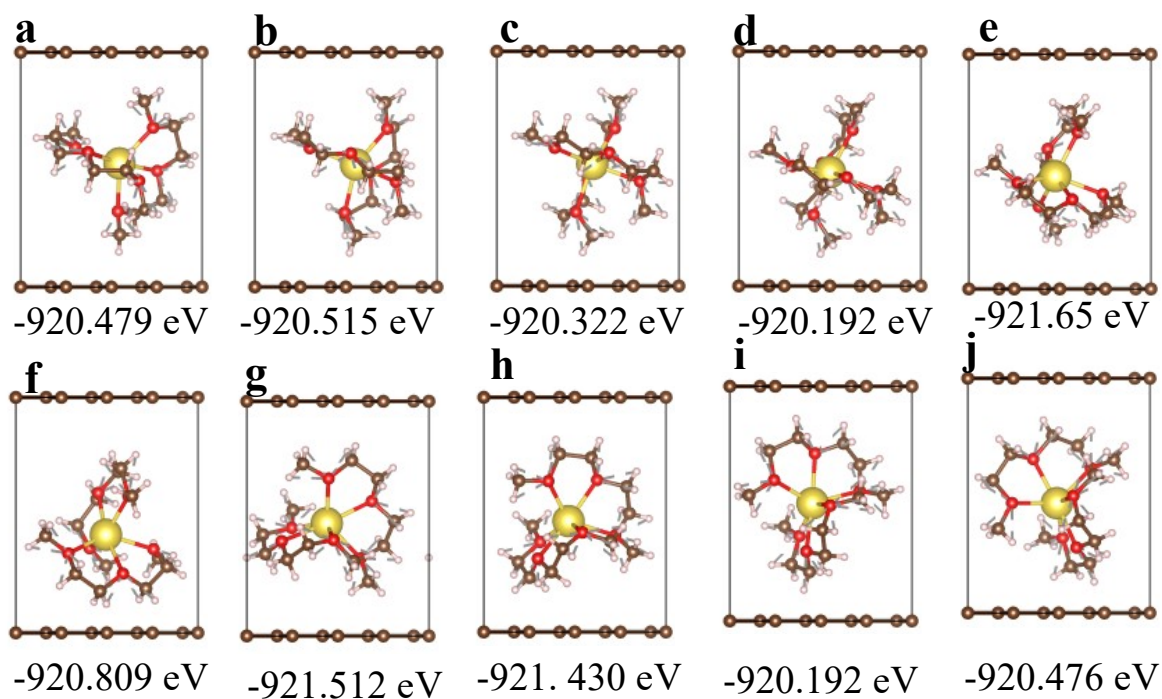

**Fig. S2** Initial configurations used to identify the most stable structure for  $D_1$ -G system.

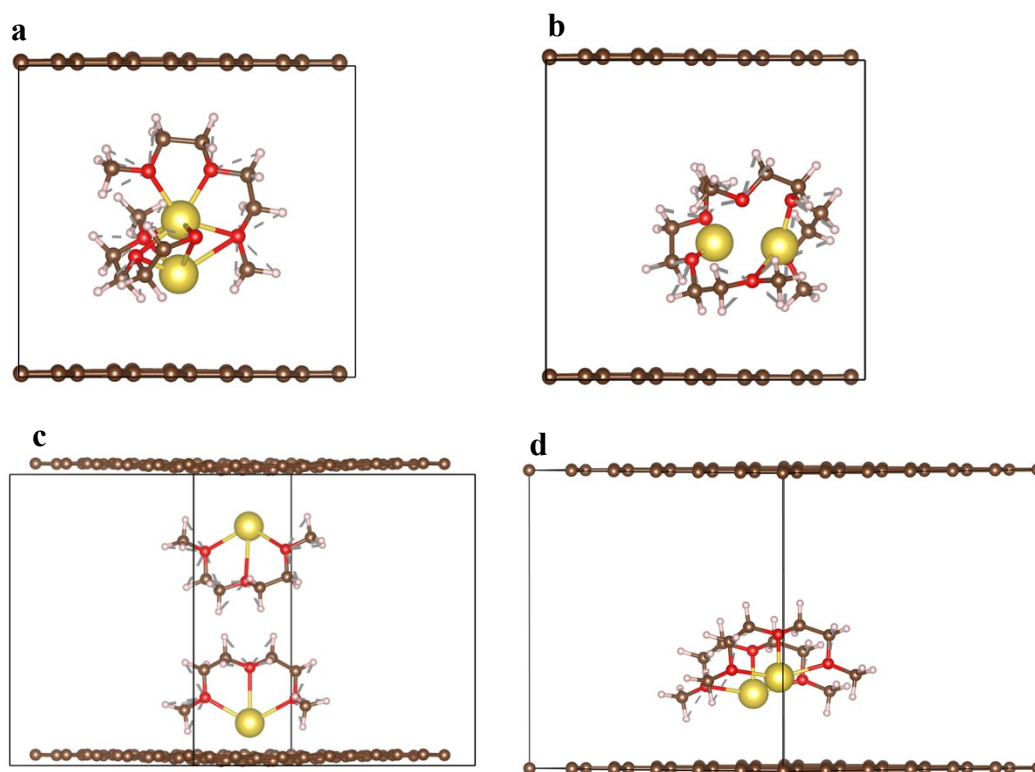

**Fig. S3** Four different initial configurations used for the calculation of  $Na_2$ - $D_2$ -G system. Energies are a) -922.11 eV b) -922.15 eV c) -922.27 eV and d) -922.21 eV, respectively.

| Side view                                                                           | Top view                                                                                                    | Binding Energy |
|-------------------------------------------------------------------------------------|-------------------------------------------------------------------------------------------------------------|----------------|
| 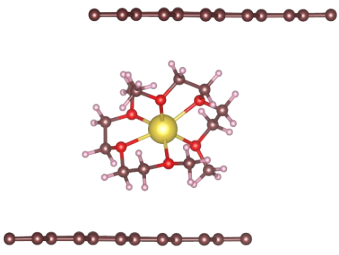   | <br>Cell size 1 x 1 x 1   | -3.498 eV      |
|    | <br>Cell size 1 x 2 x 1   | -3.614 eV      |
|  | <br>Cell size 2 x 2 x 1 | -3.726 eV      |

**Fig. S4** Calculated binding energy for the increased unit cell sizes. The initial unit cell size has been increased along the a and b direction to study the binding energy change when increasing the unit cell size.
